# Supplementary material for: Heterogeneous Cellular Response of Primary and Metastatic Human Gastric Adenocarcinoma Cell Lines to Magnoflorine and Its Additive Interaction with Docetaxel
Source: MDPI journal article supplement (doi:10.3390/ijms242115511), 2023-10-24

# SUPPLEMENTARY FILE

Figure S1. The chromatogram of magnoflorine isolated from *Berberis vulgaris* root

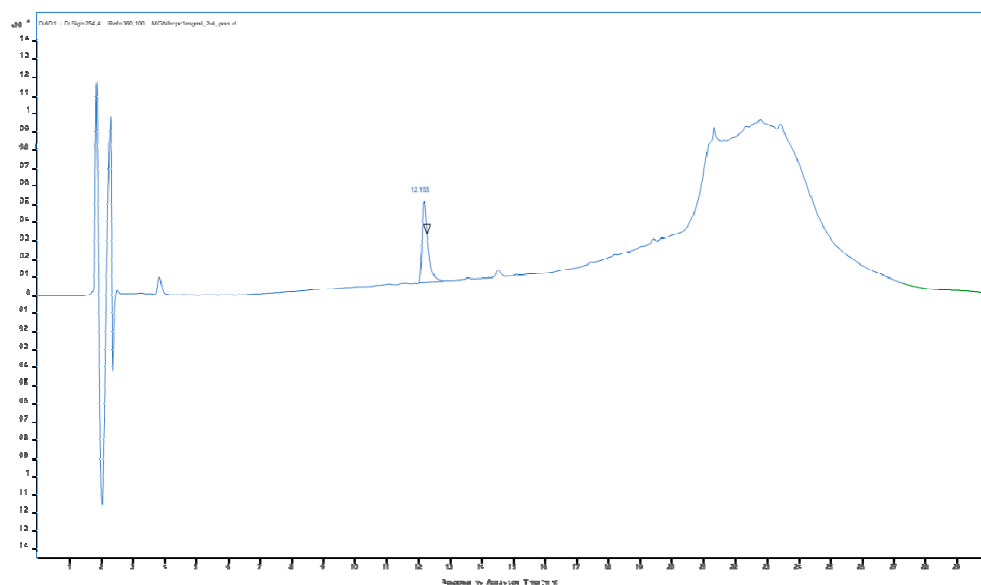

Figure S2. The MS/MS chromatogram showing the fragmentation of the isolated magnoflorine

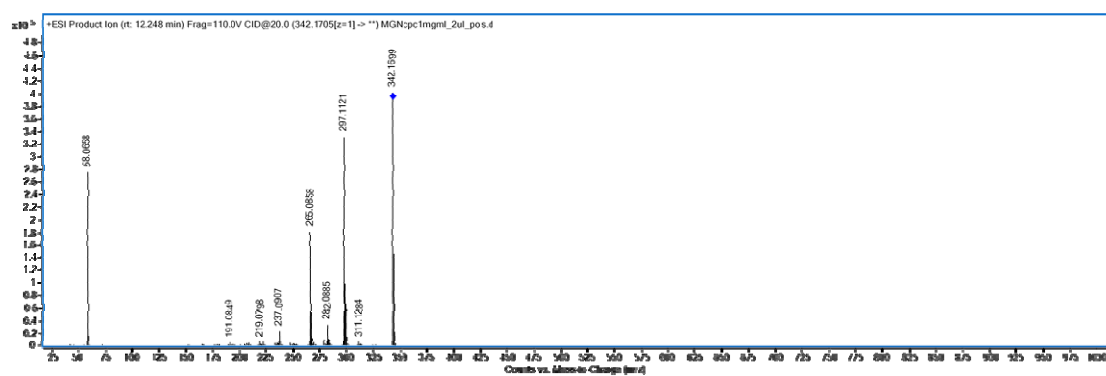

Figure S3. Chromatogram registered by the CPC instrument with the peak of magnoflorine eluted after 63 min

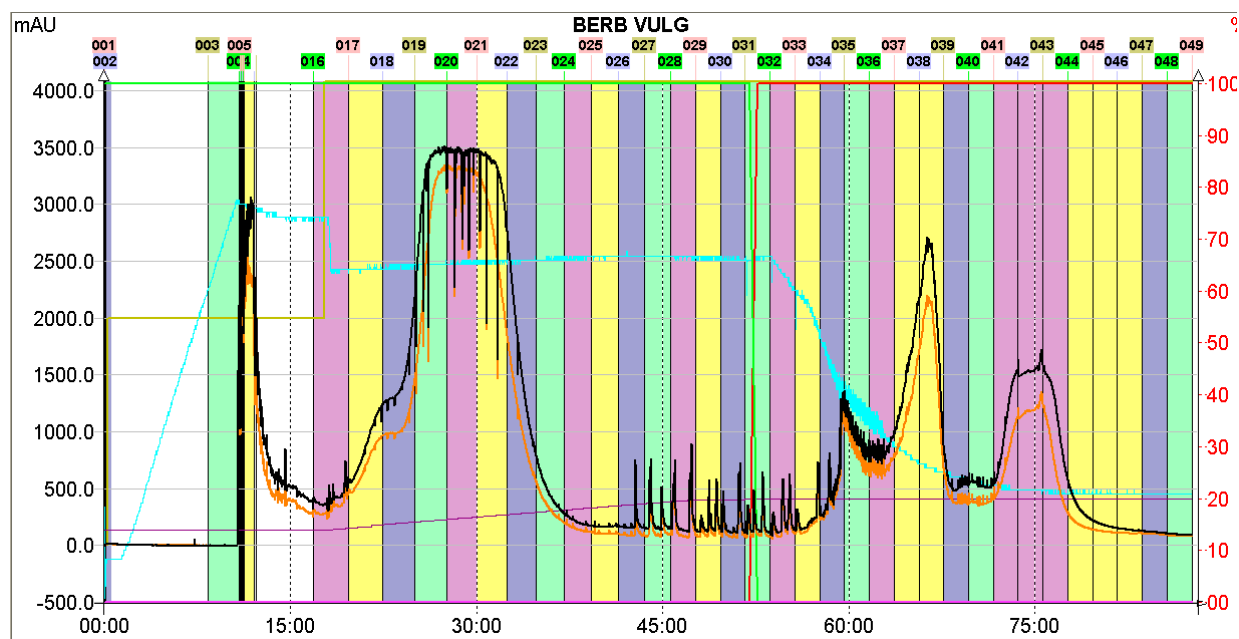

Supplement: s1 [file s1]
